# Supplementary material for: Morphology-tunable In2Se3 nanostructures with enhanced electrical and photoelectrical performances via sulfur doping
Source: Royal Society of Chemistry journal article supplement (doi:10.1039/c0jm01013h), 2010-01-01
Supplement: c0jm01013h.pdf [file c0jm01013h.pdf]

*Supporting information*

**Morphology-tunable  $\text{In}_2\text{Se}_3$  nanostructures with enhanced electrical and photoelectrical performances via sulfur doping**

Tianyou Zhai,<sup>\*ab</sup> Ying Ma,<sup>b</sup> Liang Li,<sup>\*a</sup> Xiaosheng Fang,<sup>a</sup> Meiyong Liao,<sup>c</sup> Yasuo Koide,<sup>c</sup>

Jiannian Yao,<sup>b</sup> Yoshio Bando<sup>a</sup> and Dmitri Golberg<sup>a</sup>

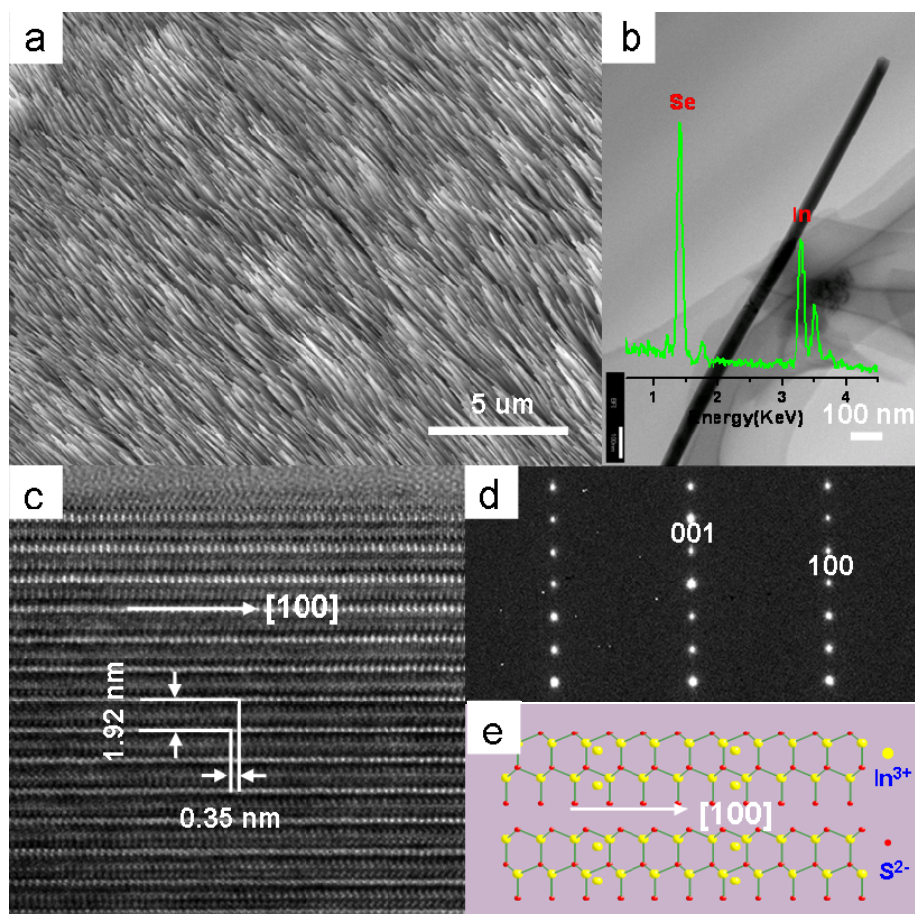

**Fig. S1**  $\text{In}_2\text{Se}_3$  ordered nanowire arrays formed in zone I. (a) SEM image of  $\text{In}_2\text{Se}_3$  nanowire arrays; (b) TEM image and the corresponding EDS spectrum (inset) of an individual  $\text{In}_2\text{Se}_3$  nanowire; (c, d) HRTEM image and the corresponding SAED pattern of the nanowire verifying that it grew along [100] direction; (e) Atomic model of a WZ-type  $\text{In}_2\text{Se}_3$  nanowire. (ref. 24)

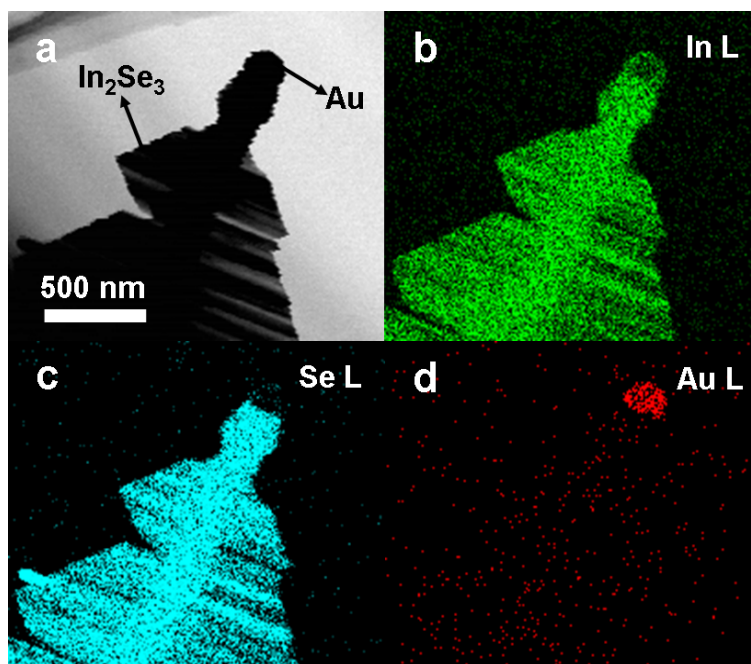

**Fig. S2** (a) STEM image of an individual  $\text{In}_2\text{Se}_3$  nanotree; (b, c, d) Spatially resolved EDS elemental maps depicting the distribution of the constituting elements within the nanotree: the images correspond to the In L-edge, Se L-edge and Au L-edge signals, respectively.

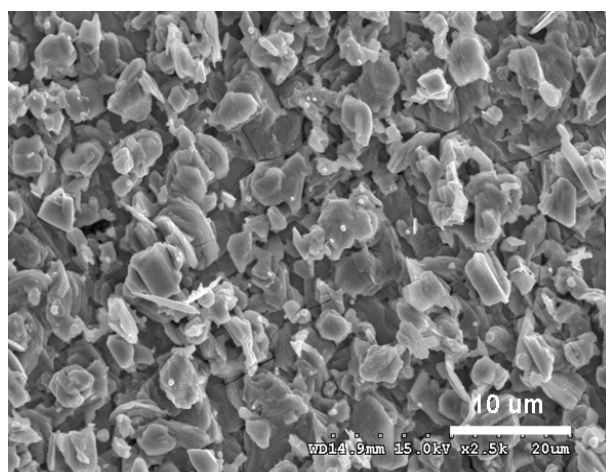

**Fig. S3** SEM image of the synthesized  $\text{In}_2\text{Se}_3$  products without using Au catalysts.

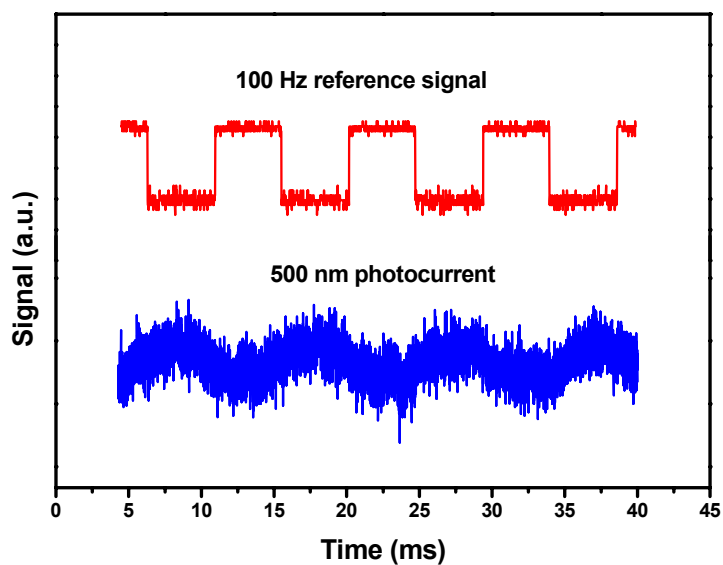

**Fig. S4** A transient response by illuminating an undoped  $\text{In}_2\text{Se}_3$  nanowire photodetector with a 500 nm light pulse chopped at a frequency of 100 Hz at a bias of 10V along with the reference signal of the chopped light at 100 Hz. The rise and fall times were measured to be  $\sim 2.3$   $\mu\text{s}$  and  $\sim 1.6$   $\mu\text{s}$ , respectively.
